1 **Treatment of canine visceral leishmaniasis with Milteforan™ induces**  
2 ***Leishmania infantum* resistance to miltefosine and amphotericin B**

3 Gustavo Gonçalves,<sup>a</sup> Monique Paiva Campos,<sup>a</sup> Alessandra Silva Gonçalves,<sup>b</sup> Lia  
4 Carolina Soares Medeiros,<sup>a</sup> Fabiano Borges Figueiredo<sup>a</sup>

5 <sup>a</sup>Laboratório de Biologia Celular, Instituto Carlos Chagas, Fundação Oswaldo Cruz  
6 (FIOCRUZ), Curitiba, Paraná, Brazil.

7 <sup>b</sup>Médica veterinária autônoma.

8

9 **Abstract**

10 Visceral leishmaniasis (VL) is the most severe form of leishmaniasis and is caused  
11 by *Leishmania infantum* in the Americas. Since the use of Milteforan™ was  
12 authorized to treat canine visceral leishmaniasis (CVL) in Brazil in 2017, there has  
13 also been fear of the emergence of parasites resistant to this drug and, through  
14 cross-resistance mechanisms, to meglumine antimoniate and amphotericin B.  
15 Additionally, the literature shows that acquisition of resistance is followed by  
16 increased parasite fitness, with higher rates of proliferation, infectivity and  
17 metacyclogenesis, which are determining factors for parasite virulence. In this  
18 context, this study aims to analyze the impact of treating a dog with Milteforan™ on  
19 the generation of parasites resistant to miltefosine, meglumine antimoniate, and  
20 amphotericin B. To this end, *in vitro* susceptibility tests were conducted against these  
21 drugs with T0 (parasites isolated from the dog before treatment with Milteforan™),  
22 T1 (after one course of treatment), and T2 (after two courses of treatment) isolates.

23 The rates of cell proliferation, infectivity, and metacyclogenesis of the isolates were  
24 also evaluated. The results indicate a gradual increase in parasite resistance to  
25 miltefosine and amphotericin B with increasing the number of treatment courses. A  
26 trend increase in the metacyclogenesis rate of the parasites was also observed as  
27 drug resistance increased. Therefore, treatment of CVL with Milteforan™ induces  
28 resistance to miltefosine and amphotericin B as well as changes in parasite fitness,  
29 and may have an impact on animal and human public health.

30 **Keywords:** clinical isolate, in vitro test, amastigote, promastigote.

31

## 32 **Introduction**

33 Leishmaniasis is a parasitic disease caused by protozoa of the genus *Leishmania*  
34 and transmitted by the bite of infected sandflies. Its most severe form, visceral  
35 leishmaniasis (VL) (1), shows clinical characteristics of severe evolution in humans  
36 (2), with occurrence of a zoonotic cycle both in South America and in the  
37 Mediterranean Sea region (3,4). In this context, *Leishmania infantum* (syn =  
38 *Leishmania chagasi*) is the most important etiological agent involved (5) and the dog  
39 (*Canis familiaris*) is the main host (2). Canine leishmaniasis preceded the occurrence  
40 of human cases (2,6,7), and control of the zoonotic cycle is still a challenge (3).

41 Treatment options for leishmaniasis are limited and unsatisfactory. For more than 60  
42 years, human treatment was centered on the use of pentavalent antimonials (8).  
43 After that, new drugs were developed, but the arsenal to treat VL is still limited, thus

44 characterizing this disease as neglected. Current therapies rely on three main drugs:  
45 pentavalent antimonials (first drug of choice), amphotericin B, and miltefosine (9).

46 Treatment with miltefosine presents important limitations because of its teratogenic  
47 character and long half-life, which facilitate the emergence of parasite resistance that  
48 can be easily established through isolated point mutations (10). Additionally,  
49 monotherapy based on this drug is no longer recommended in humans because of  
50 the observed flaws and the rapid acquisition of drug resistance by the parasites  
51 (11,12), and it should now be used in combination with other anti-*Leishmania* drugs  
52 (9).

53 In 2017, the use of Milteforan™ was authorized to treat canine visceral leishmaniasis  
54 (CVL) in Brazil (13). However, treatment failures have been observed both in  
55 monotherapy and combined therapies (14,15), with improvement in canine  
56 symptomatology not followed by parasitological clearance (16). Thus, treatment is  
57 still not considered an effective control measure because, in addition to the risk of  
58 parasite resistance, relapses are frequent and dogs can continue to infect the  
59 invertebrate host even weeks after the end of treatment, despite being clinically  
60 cured (17).

61 Therefore, in addition to the risk involving the treatment of dogs with miltefosine in  
62 relation to the possible emergence of parasites resistant to this drug, there are  
63 reports of cross-resistance to other drugs (18–23), which can lead to the emergence  
64 of parasites resistant not only to miltefosine, but also to other drugs used to treat  
65 CVL, further aggravating the public health problem, especially after the authorization  
66 of this treatment in dogs in 2017 (13).

67 Moreover, there are also reports on the impact of acquisition of resistance on  
68 parasite fitness, where drug-resistant parasites presented higher rates of cell  
69 proliferation, metacyclogenesis, and infectivity compared with those of susceptible  
70 parasites(24–26), which are aggravating factors of disease virulence (27) that may  
71 have an impact on public health.

72 In this context, the present study aimed to analyze the impact of treating a dog with  
73 CVL with Milteforan™ on the generation of parasites resistant to miltefosine, as well  
74 as to meglumine antimoniate and amphotericin B, through cross-resistance  
75 mechanisms. It also aimed to determine the impact of possible acquisition of  
76 resistance on the rates of cell proliferation, metacyclogenesis, and infectivity of the  
77 parasite.

78

## 79 **Methods**

80 **Experimental design and collection of isolates.** The isolates used in this study  
81 were collected from a naturally infected, mixed-breed female dog, aged  
82 approximately 5 years, from the municipality of Campo Grande, state of Mato Grosso  
83 do Sul, Brazil. After positive serological diagnosis using the Dual-path Platform  
84 chromatographic immunoassay (DPP®), additional collections were performed to  
85 confirm the infection by *Leishmania infantum* through quantitative Polymerase Chain  
86 Reaction (qPCR) and parasitological culture. For the qPCR, a 3 mm diameter intact  
87 skin fragment was obtained by punch biopsy and stored in a sterile flask free of  
88 RNase and DNase at –20 °C. For the parasitological culture, in addition to another

89 skin fragment, bone marrow and lymph node aspirates were collected and stored in  
90 sterile saline solution containing antibiotics and antifungals under refrigeration. The  
91 samples were kept at 4 °C for 24 h, sown in biphasic culture medium containing  
92 Novy-MacNeal-Nicole (NNN) medium and Schneider's insect medium supplemented  
93 with 10% fetal bovine serum (FBS), and examined weekly by optical microscopy in  
94 search of promastigote forms of the parasite for one month (28). Confirmation of  
95 infection and characterization of the parasite as *L. infantum* was performed using  
96 qPCR with specific species primers. After DNA extraction, the sample was amplified  
97 using the TaqMan<sup>®</sup> system on the StepOne™ platform (Applied Biosystems<sup>®</sup>). The  
98 TaqMan<sup>®</sup> MGB probe and the qPCR were designed to target the conserved regions  
99 of the *L. infantum* KDNA. The primers LEISH-1 (5'-  
100 AACTTTTCTGGTCCTCCGGGTAG-3 ') and LEISH-2 (5'-ACCCCAGTT  
101 TCCCGCC-3') and the probe TaqMan-MGB (FAM- 5'AAAAATGGGTGCAGAAAT-  
102 3'- NFQM- 3GB) (29,30) were used. The samples were amplified on the StepOne™  
103 platform. After confirmation of infection with by all proposed methodologies (DPP<sup>®</sup>,  
104 qPCR, and parasitological culture), treatment with Milteforan™ was started. The  
105 treatment was carried out according to the manufacturer's instructions in two courses  
106 with an interval of four months between them. In each treatment course, 20 mg/kg  
107 of the drug was administered in daily doses for 28 consecutive days. New collections  
108 were performed immediately before the start of the new course aiming to isolate, in  
109 addition to the parasites already isolated prior to treatment commencement (T0),  
110 parasites after one (T1) and two (T2) courses of treatment, as shown in Figure 1.  
111 The study was approved by the Ethics Committee on Animal Use of FIOCRUZ under  
112 protocol no. P-12 / 2020-6.

113

114 **Drugs.** The commercial drugs Milteforan™ (Virbac®), Glucantime (generic  
115 pharmacy), and Amphotericin B (generic pharmacy) were used for the *in vitro*  
116 assays as a sources of miltefosine, meglumine antimoniate, and amphotericin B,  
117 respectively. The drugs were stored as indicated on their package inserts and diluted  
118 immediately before the assays in Schneider's culture medium until the desired  
119 concentrations were reached.

120

121 ***In vitro* susceptibility of isolates to miltefosine, meglumine antimoniate, and**  
122 **amphotericin B.** Aiming to evaluate the possible emergence of drug resistant  
123 parasites as a result of treating the dog with Milteforam™, the half maximal inhibitory  
124 concentration (IC<sub>50</sub>) values of the *L. infantum* T0, T1, T2, and reference strain  
125 (MHOM/BR/74/PP75) promastigote and amastigote forms were determined against  
126 miltefosine, meglumine antimoniate, and amphotericin B. The IC<sub>50</sub> values against  
127 promastigote forms were determined using the MTT (3-(4,5-Dimethylthiazol-2-yl)-  
128 2,5-Diphenyltetrazolium Bromide) colorimetric assay. Promastigote cultures in  
129 exponential growth were adjusted to a concentration of 1X10<sup>6</sup> parasites/mL and  
130 incubated (25 °C) in 96-well plates (200 µL per well) with the drugs at different  
131 concentrations for 24 h. After incubation, the cultures had their viability determined  
132 with addition of 20 µL MTT (5 mg/mL) to each well of the plate, followed by incubation  
133 at 36 °C for 3 h and solubilization of the formate crystals with 20 µL 10% sodium  
134 dodecyl sulfate (SDS) and 30 µL 100% dimethyl sulfoxide (DMSO). Absorbance  
135 reading of the wells was performed on a spectrophotometer at 550 nm (31). A control

136 (no drugs added) was used for each isolate. The IC<sub>50</sub> values were determined using  
137 cell viability values for each concentration of each drug.

138 For assays against the amastigote forms of the isolates and the reference strain, the  
139 THP-1 cell line was used as a host. The monocytes were kept at 37 °C in a humid  
140 incubator, under an atmosphere of 5% CO<sub>2</sub>, in RPMI 1640 medium supplemented  
141 with 10% FBS, HEPES, and 1% antibiotic (Penicillin Streptomycin, Sigma). Cultures  
142 were maintained by weekly breeding until their growth reached 1x10<sup>6</sup> cells/mL.  
143 Thereafter, THP-1 cells were seeded in 96-well plates at a density of 5x10<sup>4</sup> cells/well  
144 in RPMI 1640 medium containing 200 nM phorbol myristate acetate (PMA). The  
145 plates were then incubated for 96 h to allow cell differentiation to adhered  
146 macrophages, and the culture medium was replaced with a new one without PMA  
147 after 48 h. Concomitantly with this process, the isolates and the reference strain of  
148 *L. infantum* were cultured up to 6-7 days in order to be able to inoculate cells already  
149 adhered and differentiated in the macrophages. Inoculation was carried out in the  
150 proportion of 10 parasites per cell (10:1) and incubated in wells containing the  
151 differentiated cells for 4 h. The different drug concentrations were then added (in  
152 triplicate per evaluated dose) to each well and the plates were incubated for 48 h.  
153 After treatment, the cells were fixed with methanol and stained with DAPI to perform  
154 the intracellular amastigote count. A negative control (without treatment) was used  
155 as a 100% infection. Inhibitory activity was assessed by counting the number of  
156 intracellular amastigotes in 100 cells randomly captured from each well (40x  
157 objective). Values were expressed as percentage of inhibition:  $PI = 100 - ((Tx100) /$   
158  $C)$ , where *T* corresponds to the average number of amastigotes treated and *C* to the

159 average number of amastigotes from the negative control (32). The IC<sub>50</sub> values were  
160 determined using PI values for each concentration of each drug.

161

162 **Impact of treatment with Milteforam™ on the growth curves and infectivity and**  
163 **metacyclogenesis rates of the isolates.** The impact of the possible acquisition of  
164 resistance on the fitness, growth curves, and infectivity and metacyclogenesis rates  
165 of the parasites was determined. To measure the growth curve, a culture containing  
166 the isolates and the reference strain in exponential growth phase was adjusted to  
167 the concentration of 1X10<sup>6</sup> parasites/mL and seeded in a 24-well plate (1 mL per  
168 well). The absorbance values were measured at 800 nm every 24 h, for 8 days to  
169 correlate the increase in absorbance with the concentration of parasites in the culture  
170 (33). For determination of the infectivity rates, THP-1 cells were infected with the  
171 isolates and the reference strain as previously described. After fixing, staining, and  
172 counting of 100 cells, the average number of amastigotes per cell infected with the  
173 isolates and with the reference strain were compared. The metacyclogenesis rates  
174 were determined by the negative selection methodology with peanut agglutinin  
175 (PNA) (Sigma, St. Louis, MO, USA) (34,35). Briefly, 6-7 day cultures of the isolates  
176 and the reference strain were collected by centrifugation at 2000 xg for 10 min and  
177 resuspended at a concentration of 2X10<sup>8</sup> parasites/mL in 10 mL of Schneider's  
178 medium supplemented with 50 µg/mL PNA. The promastigotes were left at room  
179 temperature for 30 min for agglutination. Immediately after that, the supernatant and  
180 the pellet were collected. The pellet was resuspended in the same initial Schneider's  
181 medium volume with 50 µg/ml PNA. The two fractions were collected by



182 centrifugation at 200 xg for 10 min and the supernatant resulting from both was  
183 centrifuged at 2000 xg for 10 min to obtain the metacyclic promastigotes. The  
184 number of metacyclic promastigotes was determined by counting in a Neubauer  
185 chamber and the percentage of metacyclogenesis among the isolates was  
186 calculated by the ratio of the number of metacyclic promastigotes to the total initial  
187 promastigote population. All experiments were carried out in triplicate.

188

189 **Statistical analysis.** Data normality was assessed by a Kolmogorov-Smirnov test  
190 and the IC<sub>50</sub> values was obtained with The GraphPad 5.0 (Prism) program using  
191 non-linear regression. To compare all groups was used the parametric one-way  
192 analysis of variance (ANOVA), followed by the Tukey test.

193

## 194 **Results**

195 After a positive result in the DPP® test, skin fragments and bone marrow and lymph  
196 node aspirates were collected aiming to confirm infection by *L. infantum* and isolate  
197 the parasite in culture. The species specific primers used in the qPCR successfully  
198 confirmed infection by *L. infantum*, and the parasite was isolated in culture. All tests  
199 were repeated immediately before the start of a new treatment course, resulting in  
200 three different isolates: MCAN/BR/19/CG06T0 (T0), MCAN/BR/19/CG06T1 (T1),  
201 and MCAN/BR/20/CG06T2 (T2), which enabled access to the parasites at different  
202 stages throughout the dog's treatment with Milteforan™, as shown in Figure 1.

203

204 **Susceptibility assay.** Susceptibility assays conducted with the isolates and the  
205 reference strain showed significant increase in the IC<sub>50</sub> values of the promastigote  
206 (Figure 2; Graphs A and C) and amastigote (Figure 2; Graphs B and D) forms of the  
207 parasite, thus evidencing resistance to miltefosine and amphotericin B as the  
208 number of treatment courses increased. The parasites isolated prior to treatment  
209 (T0) presented IC<sub>50</sub> values against miltefosine equal to that of the control; however,  
210 these values increased after only one course of treatment (T1) (Graphs A and B),  
211 diverging statistically from the control with the reference strain. The upward trend  
212 continued throughout the treatment, with T2 isolates presenting IC<sub>50</sub> values  
213 approximately two times higher compared with that of the reference strain.

214 The same pattern was observed in the parasites treated with amphotericin B, where  
215 an increase in resistance to the drug was verified throughout the treatment courses  
216 (Figure 2; Graphs C and D). In the promastigote forms of the parasites (Graph C),  
217 the IC<sub>50</sub> values of the isolates before the dog's treatment with Milteforan™ (T0) was  
218 already higher than that of the reference strain; this was also a fact for T1 in the  
219 assays with amastigote forms (Graph D). No statistical difference was found  
220 between the IC<sub>50</sub> values of the T0, T1, and T2 isolates against meglumine  
221 antimoniate; therefore, they did not increase their resistance to this drug as the  
222 treatment course with Milteforan™ progressed in the dog.

223

224 **Impact of possible acquisition of resistance on the proliferation,**  
225 **metacyclogenesis and infectivity rates of the parasites.** Results of the growth  
226 curve of the isolates in culture medium showed no difference between the number

227 of parasites or cell proliferation rate on any of the days analyzed. However, when  
228 compared with the growth curve of the reference strain, a clear discrepancy in the  
229 proliferation rate can be observed after the third day of cultivation (Figure 3). Another  
230 difference observed was the time required to reach the growth curve plateau: 5-6  
231 days for the isolates and 6-7 days for the reference strain; in addition, the reference  
232 culture showed a parasite density approximately 2.5 five times higher than those of  
233 the isolated parasites on its plateau.

234 The impact of acquisition of resistance on parasite infectivity was evaluated by  
235 comparing the average number of amastigotes per cell infected with the isolates and  
236 with the reference strain. Figure 4 shows that the cells infected with the reference  
237 strain have an average of six amastigotes per cell, a number larger than the T0  
238 (fewer than four amastigotes per cell) and T1 and T2 (both with fewer than two  
239 amastigotes per cell) isolates.

240 Analysis of the metacyclogenesis rate of the isolates through differential selection  
241 with PNA revealed a tendency of increasing the number of metacyclic promastigotes  
242 in the cultures as the number of treatment courses increased. Parasites isolated from  
243 the dog before treatment with Milteforan™ showed an average of  $2 \times 10^4$   
244 parasites/mL. After one course of treatment, this number increased to about  $3 \times 10^4$   
245 parasites/mL, and it reached approximately  $5 \times 10^4$  parasites/mL after two treatment  
246 courses. Although no statistical difference in the number of metacyclic promastigotes  
247 was observed between the isolates at the different stages of treatment, the  
248 metacyclogenesis rates show a clear upward trend (Figure 5).

249

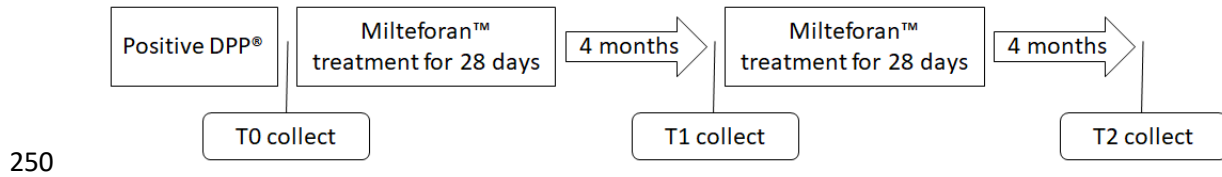

250

251 Figure 1: Schematic representation of the experimental design consisting of  
252 collection of T0 (parasites collected immediately after positivity in the DPP® test and  
253 before treating the dog with Milteforan™) isolates followed by treatment of the dog  
254 with the drug for 28 consecutive days; after four months, collection of T1 (parasites  
255 collected from the dog after one course of treatment) isolates followed by another  
256 treatment of the dog with Milteforan™ for 28 days; finally, after another 4-month  
257 interval, collection of T2 (parasites collected from the dog after two courses of  
258 treatment) isolates.

259

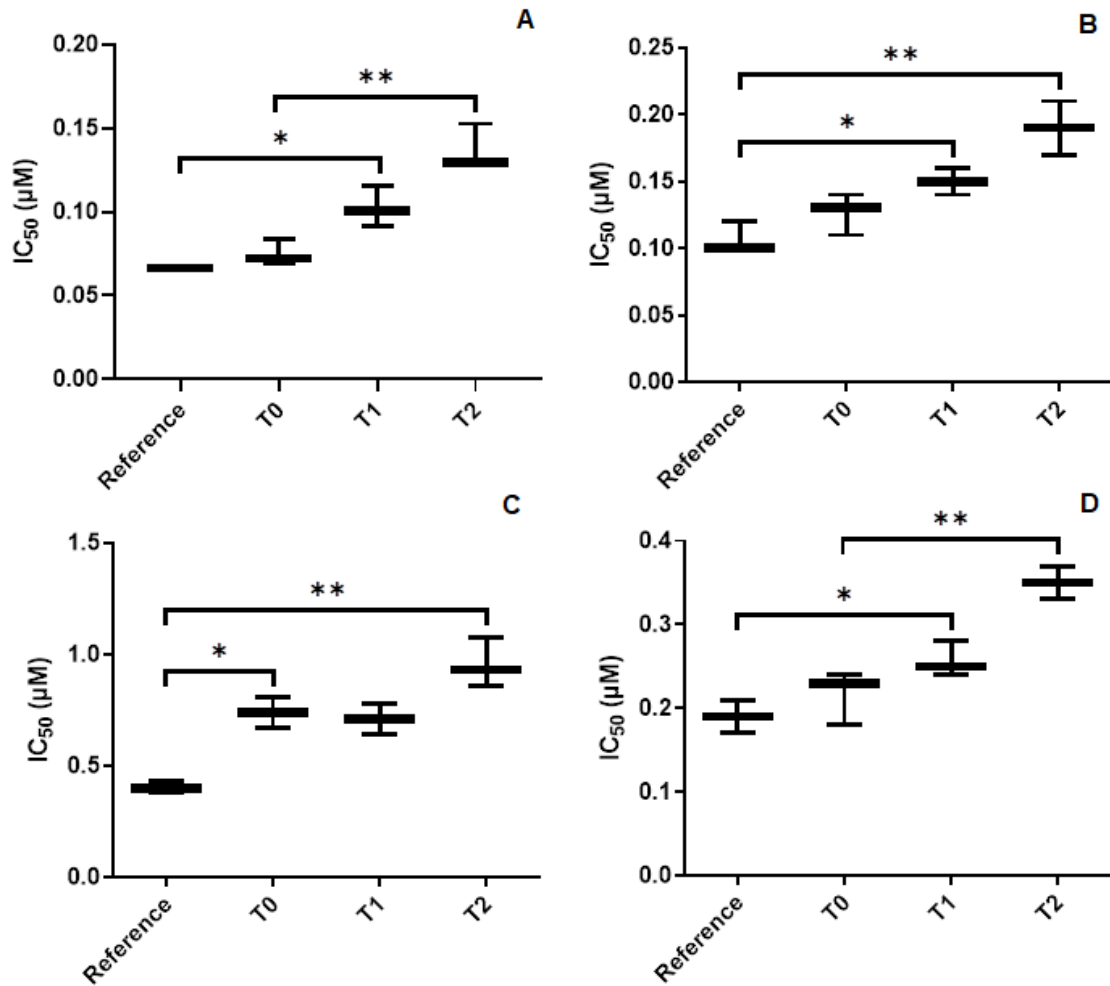

260

261 Figure 2: Results of *in vitro* resistance tests of the isolates and the reference strain  
262 to the drugs tested. Graphs A and B show the IC<sub>50</sub> values of the promastigote (Graph  
263 A) and amastigote (Graph B) forms of the isolates and reference strain against  
264 miltefosine. Graphs C and D show the IC<sub>50</sub> values of promastigote (Graph C) and  
265 amastigote (Graph D) forms of the isolates and reference strain against amphotericin  
266 B. Statistical significance is demonstrated by the asterisks, with one asterisk (\*)  
267 denoting significance <0.05% and two asterisks (\*\*) corresponding to significance  
268 <0.01%.

269

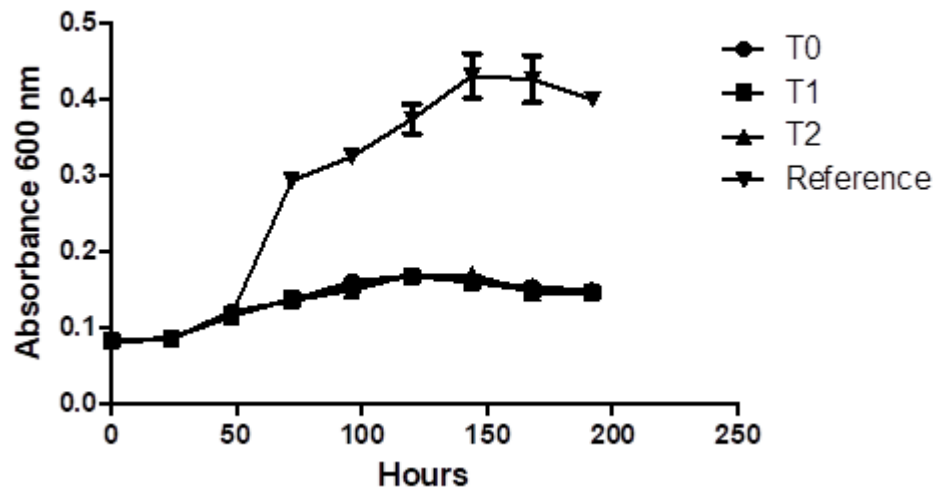

270

271 Figure 3: Growth curve of the T0, T1, T2, and reference strain (MHOM/BR/74/PP75)  
272 isolates in daily readings of parasite density on a spectrophotometer at 600 nm for  
273 eight days.

274

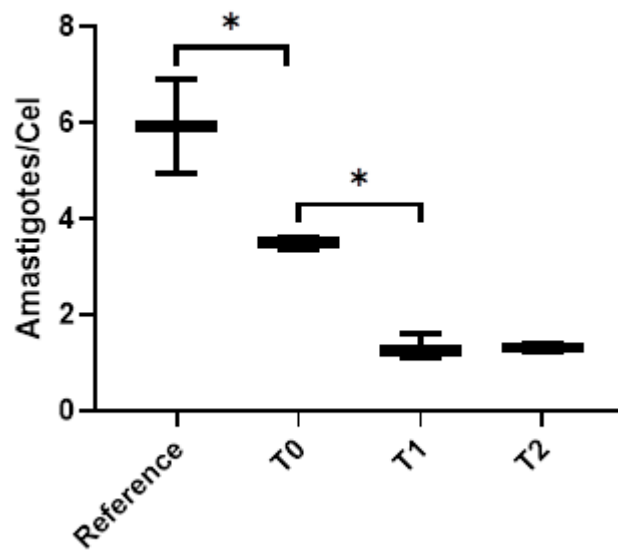

275

276 Figure 4: Average number of amastigotes per THP-1 cell infected with the reference  
277 strain (MHOM/BR/74/PP75), parasites isolated from the dog before treatment (T0),  
278 after one course of treatment (T1), and after two courses of treatment (T2). Statistical  
279 significance is shown by asterisks, with one asterisk (\*) denoting significance  
280 <0.05%.

281

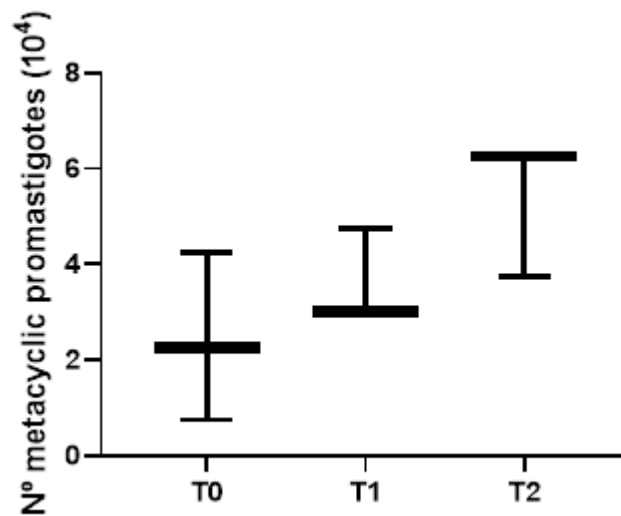

282

283 Figure 5: Number of metacyclic promastigotes for each isolate after 6 days of culture  
284 and differential selection with peanut agglutinin (PNA).

285

## 286 Discussion

287 A strong linear correlation ( $R^2 = 0.87$ ) was observed between the number of  
288 treatment courses with Milteforan™ to which the dog was subjected and the increase  
289 in the IC<sub>50</sub> values of *L. infantum* isolates against this drug. This finding was already  
290 expected, considering that the literature brings many reports on the rapid acquisition

291 of resistance by parasites in places where Milteforan™ therapy was adopted (11,12).  
292 The results of our experiments can be explained by the fact that the treatment of  
293 dogs with Milteforan™ is not considered a totally effective control measure (17), with  
294 decreased symptoms not followed by parasitological clearance (16). These parasites  
295 that remain in the animal's organism are exposed to subtherapeutic doses resulting  
296 from the long half-life of this drug (10), which produce a selection of resistant  
297 parasites and, consequently, induce resistance in the general population in the long  
298 term. This *in vivo* dynamic is very similar to that observed in *in vitro* resistance  
299 induction experiments (36), where the parasite is exposed to sub-effective and  
300 increasing doses of the drug, leading to a gradual increase in its resistance to it. The  
301 same behavior has already been observed in the treatment of dogs with meglumine  
302 antimoniate, where the larger the number of courses of drug treatment in dogs, the  
303 greater the resistance of isolated parasites to this drug (37–39).

304 It is well established that isolates with lower *in vitro* IC<sub>50</sub> values are related to cases  
305 in which drug therapy is more successful in the clinic (40), with the opposite being  
306 also valid. The IC<sub>50</sub> values of the isolates of the present study at T0 were already  
307 higher than the limit proposed by Carnielli et. al. (2019), who established the  
308 maximum value for therapeutic success at 0.8 µM (isolates that presented values  
309 above this limit were often associated with therapeutic failure). Over the course of  
310 the Milteforan™ therapy, the IC<sub>50</sub> values of the isolates reached an average of 0.95  
311 µM, approximately two times more resistant than the reference strain (considered  
312 sensitive) and much higher than the limit established for therapeutic success. This  
313 factor may further aggravate the limitations of Milteforan™-based monotherapy in



314 dogs, which is already impaired in Brazil, among other factors, by the natural  
315 resistance of circulating parasites to this drug (41).

316 In addition, studies have shown that resistance to Milteforan™ remains constant  
317 even after passage through sandflies (42) and successive *in vitro* passages (39).  
318 This fact, combined with the wide use of Milteforan™ therapy to treat CVL in endemic  
319 areas, intense zoonotic transmission, and coupled with the fact that the dog can  
320 infect the invertebrate host even weeks after the end of treatment, despite being  
321 clinically cured (17), aggravate the problem involving the emergence of resistant  
322 parasites, since the dog can become infected with parasites that have already come  
323 into contact with the drug and, consequently, already present high resistance to it.

324 The isolates analyzed showed acquisition of resistance not only to the drug which  
325 they had contact with during the treatment of the dog (Miltefosine), but also to  
326 amphotericin B. This phenomenon, called cross-resistance, is well established in  
327 species of the genus *Leishmania* and involves several drugs(18,20,21,23,43,44). It  
328 is often associated with similar detoxification mechanisms by the parasite in  
329 response to different drugs, such as increased resistance to nitric oxide and  
330 expression of genes linked to the thiol metabolism of parasites exposed to  
331 meglumine antimoniate, which in turn also leads to increased resistance to  
332 allopurinol, another anti-leishmania drug with which metabolic protection routes are  
333 apparently shared (19,43,44). Although the detoxification mechanism shared  
334 between the drugs still remains uncertain, Mondelaers et al. (2018) reported clear  
335 cross-resistance between miltefosine and amphotericin B, corroborating the findings  
336 of the present study. In our analyses, a strong linear correlation ( $R^2 = 0.83$ ) was

337 observed between the number of treatment courses with Milteforan™ to which the  
338 dog was submitted and the increase in the IC<sub>50</sub> values of *L. infantum* isolates against  
339 amphotericin B. Acquisition of resistance to amphotericin B was similar to that to  
340 miltefosine, with IC<sub>50</sub> values already higher than the control at T0, reaching values  
341 about 1.8 times higher after two courses of treatment with Milteforan™ (T2).

342 The presence of a cross-resistance phenomenon where the treatment of dogs with  
343 Milteforan™ generates parasites resistant not only to miltefosine, but also to  
344 amphotericin B extrapolates from the problem of the emergence of resistant  
345 parasites and goes beyond the scope of animal health, reaching human health, since  
346 this drug is one of the most commonly used to treat VL in humans. Thus, parasites  
347 resistant to both drugs could be easily transmitted to other dogs and, eventually, to  
348 humans due to the intense anthrozoonotic transmission in endemic areas and to  
349 the fact that resistance is maintained even after passage through sandflies (42).  
350 Amphotericin B, in its liposomal formulation, is used to treat VL in pregnant women,  
351 children under the age of one, or in individuals aged >50 years, with comorbidities,  
352 and who are HIV positive (45,46). All of these groups are considered at risk for the  
353 disease, requiring less toxic and more effective treatment, and this effectiveness that  
354 can be harmed by the emergence of parasites resistant to the drug.

355 Results of the impact of acquisition of resistance on the parasite fitness parameters  
356 did not show significant changes. The growth curve of the isolates did not change  
357 with increasing the number of treatment courses; however, these parasites showed  
358 significantly lower growth compared with that of the reference strain. This fact can  
359 be explained by a greater adaptation of the reference strain to *in vitro* growth, since

360 it has remained for decades in this system. This factor is also possibly reflected in  
361 the production of metacyclic promastigote forms by isolated parasites in shorter  
362 cultivation times, since they have an optimized life cycle aiming at the infection of  
363 vertebrate hosts.

364 Results of the infectivity rates of the isolates against THP-1 cells demonstrated a  
365 reduction in the number of amastigotes per cell as the number of treatment courses  
366 to which the parasites were exposed increased. The current literature differs with  
367 respect to the impact of acquisition of drug resistance on parasite fitness. While  
368 some studies demonstrate that acquisition of resistance is followed by increased  
369 rates of infectivity, proliferation, and metacyclogenesis(24,25), other studies point  
370 out that the parasite has some of these parameters decreased in exchange for  
371 resistance, in a type of metabolic exchange currency (26,42,47,48) , as it seems to  
372 occur in the present study in relation to the infectivity rate of the isolates.

373 Another parameter analyzed was the metacyclogenesis rate, regarding the  
374 production of metacyclic promastigote forms by the isolates. Although no statistical  
375 difference was observed between the different times analyzed, the  
376 metacyclogenesis rates show a clear upward trend as the number of treatment  
377 courses with Milteforan™ increases. This finding disagrees with what has been  
378 previously reported: acquisition of resistance leads to decreased parasite fitness.  
379 However, some authors consider the metacyclogenesis rate as one of the most  
380 important parameters to determine the virulence of a strain (27), since a larger  
381 number of infectious forms of *Leishmania* sp. represent greater spread of the disease  
382 in the host organism and even higher transmission rates between the vertebrate host

383 and the invertebrate vector (49), which may further aggravate the finding in the  
384 present study involving the acquisition of resistance to two drugs used in animal and  
385 human therapy against VL.

386 Finally, it is worth mentioning that, although this study presents evaluations in  
387 isolated strains of only one dog, the nature of the research is unprecedented, since  
388 the same dog has been accompanied throughout its therapeutic process, enabling  
389 access to the same parasite at different stages of treatment and degrees of contact  
390 with the drug *in vivo*. Thus, it was possible to remove some biases from the study,  
391 such as genetic differences between different strains of the parasite, making it more  
392 robust, reliable, and contributing to the literature regarding the impact of treating  
393 dogs with Milteforan™ on the generation of resistant parasites.

394

## 395 **Conclusion**

396 In conclusion, treating canine visceral leishmaniasis (CVL) with Milteforan™ induces  
397 *Leishmania infantum* resistance to miltefosine and amphotericin B in both forms of  
398 the parasite's life cycle. Reduction in the infectivity rate with increasing the number  
399 of treatment courses in the dog, as well as a growth trend in the metacyclogenesis  
400 rates were observed. These factors can have a direct impact on the effectiveness of  
401 treating visceral leishmaniasis (VL) in animals and humans and, consequently, on  
402 public health.

403

## 404 **Acknowledgments**

405

406 This study was funded by Conselho Nacional de Pesquisa e Desenvolvimento  
407 (CNPq) by the grant for productivity in research (309862/2015-9) and Professional  
408 Education Expansion Program (Proep) by the grant nº 442055/2019-6. This study  
409 also was supported by Instituto Carlos Chagas and Fundação Oswaldo Cruz  
410 (Fiocruz). The funders had no role in the decision to publish, or preparation of the  
411 manuscript. We declare no conflict of interest.

412

## 413 **References**

414

- 415 1. WORLD HEALTH ORGANIZATION. Leishmaniasis. 2018 acesso em 03 de  
416 novembro de 2020. Disponível em  
417 <http://www.who.int/mediacentre/factsheets/fs375/en/#>
- 418 2. Ministério da Saúde S de V em S. Guia de Vigilância em Saúde. Brasília;  
419 2014. 812-823.
- 420 3. Werneck GL. Visceral leishmaniasis in Brazil: rationale and concerns  
421 related to reservoir control. *Revista de Saúde Pública*. 2014;48(5):851–855.  
422 <https://doi.org/10.1590/S0034-8910.2014048005615>.
- 423 4. Ready PD. Epidemiology of visceral leishmaniasis. Vol. 6, *Clinical*  
424 *Epidemiology*. Dove Medical Press Ltd. 2014; 6:147–154.  
425 <http://dx.doi.org/10.2147/CLEP.S44267>.

- 426 5. Dantas-Torres F. Canine leishmaniosis in South America. *Parasites &*  
427 *Vectors*. 2009;2(Suppl 1). <http://doi.org/10.1186/1756-3305-2-S1-S1>.
- 428 6. Bevilaqua PD, Paixão HH, Modena CM, Castro MCPS. Urbanização da  
429 leishmaniose visceral em Belo Horizonte. *Arquivo Brasileiro de Medicina*  
430 *Veterinária e Zootecnia*. 2001; 53:1–8. [https://doi.org/10.1590/S0102-](https://doi.org/10.1590/S0102-09352001000100001)  
431 [09352001000100001](https://doi.org/10.1590/S0102-09352001000100001).
- 432 7. Silva FS. Patologia e patogênese da Leishmaniose Visceral Canina. *Revista*  
433 *Trópica: Ciências Agrárias e Biológicas*. [https://doi.org/2007;1:20–31](https://doi.org/2007;1:20-31).  
434 [54610d070cf2c1a63bff7bdb](https://doi.org/2007;1:20-31).
- 435 8. Croft SL, Sundar S, Fairlamb AH. Drug resistance in leishmaniasis.  
436 *Clinical Microbiology Reviews*. 2006; 19:111–26.  
437 <http://doi.org/10.1128/CMR.19.1.111-126.2006>.
- 438 9. Hefnawy A, Berg M, Dujardin J-C, de Muylder G. Exploiting Knowledge on  
439 Leishmania Drug Resistance to Support the Quest for New Drugs. *Trends in*  
440 *Parasitology*. 2017; 33(3):162–74. <https://doi.org/10.1016/j.pt.2016.11.003>.
- 441 10. Maltezou HC. Drug Resistance in Visceral Leishmaniasis. *Journal of*  
442 *Biomedicine and Biotechnology*.  
443 2010;2010. <https://doi.org/10.1155/2010/617521>.
- 444 11. Rijal S, Ostyn B, Uranw S, Rai K, Bhattarai NR, Dorlo TPC, et al. Increasing  
445 Failure of Miltefosine in the Treatment of Kala-azar in Nepal and the Potential  
446 Role of Parasite Drug Resistance, Reinfection, or Noncompliance. *Clinical*

- 447 Infectious Diseases. 2013; 56(11):1530–  
448 1538. <https://doi.org/10.1093/cid/cit102>.
- 449 12. Sundar S, Singh A, Rai M, Prajapati VK, Singh AK, Ostyn B, et al. Efficacy  
450 of Miltefosine in the Treatment of Visceral Leishmaniasis in India After a  
451 Decade of Use. *Clinical Infectious Diseases*. 2012 Aug 15;55(4):543–550.  
452 <https://doi.org/10.1093/cid/cis474>.
- 453 13. Ministério da Agricultura P e A. NOTA TÉCNICA Nº 11/2016. 2016.  
454 Disponível em [http://www.sbmt.org.br/portal/wp-](http://www.sbmt.org.br/portal/wp-content/uploads/2016/09/nota-tecnica.pdf)  
455 [content/uploads/2016/09/nota-tecnica.pdf](http://www.sbmt.org.br/portal/wp-content/uploads/2016/09/nota-tecnica.pdf). Acesso em 15/09/2020.
- 456 14. Manna L, Corso R, Galiero G, Cerrone A, Muzj P, Gravino AE. Long-term  
457 follow-up of dogs with leishmaniosis treated with meglumine antimoniate plus  
458 allopurinol versus miltefosine plus allopurinol. *Parasites & Vectors*. 2015;  
459 8:289-298. <https://doi.org/10.1186/s13071-015-0896-0>.
- 460 15. Proverbio D, Spada E, Bagnagatti De Giorgi G, Perego R. Failure of  
461 Miltefosine Treatment in Two Dogs with Natural *Leishmania infantum*  
462 Infection. *Case Reports in Veterinary Medicine*. 2014;2014.  
463 <https://doi.org/10.1155/2014/640151>.
- 464 16. Andrade HM, Toledo VPCP, Pinheiro MB, Guimarães TMPD, Oliveira NC,  
465 Castro JA, et al. Evaluation of miltefosine for the treatment of dogs naturally  
466 infected with *L. infantum* (= *L. chagasi*) in Brazil. *Veterinary Parasitology*. 2011  
467 Sep;181(2–4):83–90. <https://doi.org/10.1016/j.vetpar.2011.05.009>.

- 468 17. Chappuis F, Sundar S, Hailu A, Ghalib H, Rijal S, Peeling RW, et al. Visceral  
469 leishmaniasis: what are the needs for diagnosis, treatment and control? Nature  
470 Reviews Microbiology. 2007 Nov;5(11):873–882.  
471 <https://doi.org/10.1038/nrmicro1748>.
- 472 18. Kumar D, Kulshrestha A, Singh R, Salotra P. In Vitro Susceptibility of Field  
473 Isolates of *Leishmania donovani* to Miltefosine and Amphotericin B:  
474 Correlation with Sodium Antimony Gluconate Susceptibility and Implications  
475 for Treatment in Areas of Endemicity. Antimicrobial Agents and  
476 Chemotherapy. 2009 Feb;53(2):835–838. [https://doi.org/10.1128/AAC.01233-](https://doi.org/10.1128/AAC.01233-08)  
477 08.
- 478 19. Holzmüller P, Sereno D, Lemesre J-L. Lower Nitric Oxide Susceptibility of  
479 Trivalent Antimony-Resistant Amastigotes of *Leishmania infantum*.  
480 Antimicrobial Agents and Chemotherapy. 2005. 49(10):4406–4409.  
481 <https://doi.org/10.1128/AAC.49.10.4406-4409.2005>.
- 482 20. Souza AS, Giudice A, Pereira JMB, Guimarães LH, de Jesus AR, de Moura  
483 TR, et al. Resistance of *Leishmania (Viannia) braziliensis* to nitric oxide:  
484 correlation with antimony therapy and TNF- $\alpha$  production. BMC Infectious  
485 Diseases. 2010;(10):209–220. <https://doi.org/10.1186/1471-2334-10-209>.
- 486 21. Ephros M, Bitnun A, Shaked P, Waldman E, Zilberstein D. Stage-specific  
487 activity of pentavalent antimony against *Leishmania donovani* axenic  
488 amastigotes. Antimicrob Agents Chemother. 1999; 43:278–282.  
489 <https://doi.org/10.1128/AAC.43.2.278>.



- 490 22. Sereno D, Cavaleyra M, Zemzoumi K, Maquaire S, Ouaiissi A. Axenically  
491 Grown Amastigotes of *Leishmania infantum* Used as an In Vitro Model To  
492 Investigate the Pentavalent Antimony Mode of Action. *Antimicrobial Agents  
493 And Chemotherapy*. 1998;42(12):3097–3102.  
494 <https://doi.org/10.1128/AAC.42.12.3097>.
- 495 23. Mondelaers A, Hendrickx S, van Bockstal L, Maes L, Caljon G. Miltefosine-  
496 resistant *Leishmania infantum* strains with an impaired MT/ROS3 transporter  
497 complex retain amphotericin B susceptibility. *Journal of Antimicrobial  
498 Chemotherapy*. 2018 Feb 1;73(2):392–394.  
499 <https://doi.org/10.1093/jac/dkx407>.
- 500 24. Eberhardt E, Bulté D, van Bockstal L, van den Kerkhof M, Cos P, Delputte  
501 P, et al. Miltefosine enhances the fitness of a non-virulent drug-resistant  
502 *Leishmania infantum* strain. *Journal of Antimicrobial Chemotherapy*. 2019;  
503 (2):395–406. <https://doi.org/10.1093/jac/dky450>.
- 504 25. Deep DK, Singh R, Bhandari V, Verma A, Sharma V, Wajid S, et al.  
505 Increased miltefosine tolerance in clinical isolates of *Leishmania donovani* is  
506 associated with reduced drug accumulation, increased infectivity and  
507 resistance to oxidative stress. *PLOS Neglected Tropical Diseases*. 2017;11(6).  
508 <https://doi.org/10.1371/journal.pntd.0005641>.
- 509 26. Rai K, Cuypers B, Bhattarai NR, Uranw S, Berg M, Ostyn B, et al. Relapse  
510 after Treatment with Miltefosine for Visceral Leishmaniasis Is Associated with

- 511 Increased Infectivity of the Infecting *Leishmania donovani* Strain. *mBio*.  
512 2013;4(5):11–13. <https://doi.org/10.1128/mBio.00611-13>.
- 513 27. Da Silva R, Sacks LD. Metacyclogenesis Is a Major Determinant of  
514 *Leishmania* Promastigote Virulence and Attenuation. *INFECTION AND*  
515 *IMMUNITY*. 1987;55(11):2802–2806.
- 516 28. Abrantes TR, Madeira M de F, da Silva DA, Perié C dos SFS, Mendes  
517 Junior AA v, Menezes RC, et al. Identification of canine visceral leishmaniasis  
518 in a previously unaffected area by conventional diagnostic techniques and cell-  
519 block fixation. *Rev Inst Med Trop*. 2016; 58:3–8.  
520 <https://doi.org/10.1590/S1678-9946201658003>.
- 521 29. Francino O, Altet L, Sánchez-Robert E, Rodriguez A, Solano-Gallego L,  
522 Alberola J, et al. Advantages of real-time PCR assay for diagnosis and  
523 monitoring of canine leishmaniosis. *Veterinary Parasitology*. 2006; 137(3–  
524 4):214–221. <https://doi.org/10.1016/j.vetpar.2006.01.011>.
- 525 30. Campo MP, Madeira MF, Silva DA, Solcà MS, Espíndola OM, Mendes  
526 Junior AA v, et al. Accuracy of quantitative polymerase chain reaction in  
527 samples of frozen and paraffin embedded healthy skin for the diagnosis of  
528 canine visceral leishmaniasis. *Arq Bras Med Vet Zootec*. 2017;69(6):1443–  
529 1450. <https://doi.org/10.1590/1678-4162-9053>.
- 530 31. Meerloo J v, Kaspers GJL, Cloos J. Cell sensitivity assays: the MTT assay.  
531 *Methods Mol Biol*. 2011; 731(10):237–245. [https://doi.org/10.1007/978-1-](https://doi.org/10.1007/978-1-61779-080-5_20)  
532 [61779-080-5\\_20](https://doi.org/10.1007/978-1-61779-080-5_20).

- 533 32. Donega M, Mello S, Moraes R, Jain S, Tekwani B, Cantrell C.  
534 Pharmacological Activities of Cilantro's Aliphatic Aldehydes against  
535 *Leishmania donovani*. *Planta Medica*. 2014; 80(18):1706–1711.  
536 <https://doi.org/10.1055/s-0034-1383183>.
- 537 33. Ouellette M, Fase-Fowler F, Borst P. The amplified H circle of methotrexate-  
538 resistant *leishmania tarentolae* contains a novel P-glycoprotein gene. *The*  
539 *EMBO Journal*. 1990; 9(4):1027–1033. [https://doi.org/10.1002/j.1460-](https://doi.org/10.1002/j.1460-2075.1990.tb08206.x)  
540 [2075.1990.tb08206.x](https://doi.org/10.1002/j.1460-2075.1990.tb08206.x).
- 541 34. Sacks DL, Hieny S, Sher A. Identification of cell surface carbohydrate and  
542 antigenic changes between noninfective and infective developmental stages  
543 of *Leishmania major* promastigotes. *J Immunol*. 1985; 135:564–569.
- 544 35. Alcolea PJ, Alonso A, Degayón MA, Moreno-Paz M, Jiménez M, Molina R,  
545 et al. In vitro infectivity and differential gene expression of *Leishmania infantum*  
546 metacyclic promastigotes: negative selection with peanut agglutinin in culture  
547 versus isolation from the stomodeal valve of *Phlebotomus perniciosus*. *BMC*  
548 *Genomics*. 2016;17(1):375–389. [https://doi.org/10.1186/s12864-016-2672-](https://doi.org/10.1186/s12864-016-2672-8)  
549 [8](https://doi.org/10.1186/s12864-016-2672-8).
- 550 36. Seifert K, Matu S, Pérez-Victoria FJ, Castanys S, Gamarro F, Croft SL.  
551 Characterisation of *Leishmania donovani* promastigotes resistant to  
552 hexadecylphosphocholine (miltefosine). *International Journal of Antimicrobial*  
553 *Agents*. 2003;22(4):380–7. [https://doi.org/10.1016/S0924-8579\(03\)00125-0](https://doi.org/10.1016/S0924-8579(03)00125-0).

- 554 37. Faraut-Gambarelli F, Piarroux R, Deniau M, Giusiano B, Marty P, Michel G,  
555 et al. In Vitro and In Vivo Resistance of *Leishmania infantum* to Meglumine  
556 Antimoniate: a Study of 37 Strains Collected from Patients with Visceral  
557 Leishmaniasis. *Antimicrobial agents and chemotherapy*. 1997;41(4):827–30.  
558 <https://doi.org/10.1128/AAC.41.4.827>.
- 559 38. Gramiccia M, Gradoni L, Orsini S. Decreased sensitivity to meglumine  
560 antimoniate (Glucantime) of *Leishmania infantum* isolated from dogs after  
561 several courses of drug treatment. *Annals of Tropical Medicine & Parasitology*.  
562 1992; 86(6):613–620. <https://doi.org/10.1080/00034983.1992.11812717>.
- 563 39. Carrió J, Portús M. In vitro susceptibility to pentavalent antimony in  
564 *Leishmania infantum* strains is not modified during in vitro or in vivo passages  
565 but is modified after host treatment with meglumine antimoniate. *BMC*  
566 *Pharmacology*. 2002;2(11). <https://doi.org/10.1186/1471-2210-2-11>.
- 567 40. Lira R, Sundar S, Makharia A, Kenney R, Gam A, Saraiva E, et al. Evidence  
568 that the High Incidence of Treatment Failures in Indian Kala-Azar Is Due to the  
569 Emergence of Antimony-Resistant Strains of *Leishmania donovani*. *The*  
570 *Journal of Infectious Diseases*. 1999; (2):564–567.  
571 <https://doi.org/10.1086/314896>.
- 572 41. Carnielli JBT, Monti-Rocha R, Costa DL, Molina Sesana A, Pansini LNN,  
573 Segatto M, et al. Natural Resistance of *Leishmania infantum* to Miltefosine  
574 Contributes to the Low Efficacy in the Treatment of Visceral Leishmaniasis in

- 575 Brazil. The American Journal of Tropical Medicine and Hygiene.  
576 2019;101(4):789–794. <https://doi.org/10.4269/ajtmh.18-0949>.
- 577 42. Van Bockstal L, Bulté D, Hendrickx S, Sadlova J, Volf P, Maes L, et al.  
578 Impact of clinically acquired miltefosine resistance by *Leishmania infantum* on  
579 mouse and sand fly infection. *Drugs and Drug Resistance*. 2020; 13:16–21.  
580 <https://doi.org/10.1016/j.ijpddr.2020.04.004>.
- 581 43. Gómez Pérez V, García-Hernandez R, Corpas-López V, Tomás AM, Martín-  
582 Sanchez J, Castanys S, et al. Decreased antimony uptake and overexpression  
583 of genes of thiol metabolism are associated with drug resistance in a canine  
584 isolate of *Leishmania infantum*. *International Journal for Parasitology: Drugs  
585 and Drug Resistance*. 2016; 2:133–139.  
586 <https://doi.org/10.1016/j.ijpddr.2016.04.003>.
- 587 44. Maia C, Nunes M, Marques M, Henriques S, Rolão N, Campino L. *In vitro*  
588 drug susceptibility of *Leishmania infantum* isolated from humans and dogs.  
589 *Experimental Parasitology*. 2013;135(1):36–41.  
590 <https://doi.org/10.1016/j.exppara.2013.05.015>.
- 591 45. Costa DL. Fatores de prognóstico na leishmaniose visceral: alterações  
592 clínicas e laboratoriais associadas à resposta imune, aos distúrbios da  
593 coagulação e à morte. [Belo Horizonte]; 2009. Disponível em  
594 <http://hdl.handle.net/1843/BUOS-96FFS7>.

- 595 46. Ministério da saúde. Sistema de gerenciamento da tabela de  
596 procedimentos, medicamentos e OPM do SUS – SIGTAP. 2019. Disponível  
597 em <http://sigtap.datasus.gov.br/tabela-unificada/app/sec/inicio.jsp>.
- 598 47. Hendrickx S, Beyers J, Mondelaers A, Eberhardt E, Lachaud L, Delputte P,  
599 et al. Evidence of a drug-specific impact of experimentally selected  
600 paromomycin and miltefosine resistance on parasite fitness in *Leishmania*  
601 *infantum*. Journal of Antimicrobial Chemotherapy. 2016; 17(7):1914–1921.  
602 <https://doi.org/10.1093/jac/dkw096>.
- 603 48. Turner KG, Vacchina P, Robles-Murguia M, Wadsworth M, McDowell MA,  
604 Morales MA. Fitness and Phenotypic Characterization of Miltefosine-Resistant  
605 *Leishmania major*. PLOS Neglected Tropical Diseases. 2015; 9(7).  
606 <https://doi.org/10.1371/journal.pntd.0003948>.
- 607 49. Doehl JSP, Bright Z, Dey S, Davies H, Magson J, Brown N, et al. Skin  
608 parasite landscape determines host infectiousness in visceral leishmaniasis.  
609 Nature Communications. 2017; 8(1):789–794. [https://doi.org/10.1038/s41467-](https://doi.org/10.1038/s41467-017-00103-8)  
610 [017-00103-8](https://doi.org/10.1038/s41467-017-00103-8).

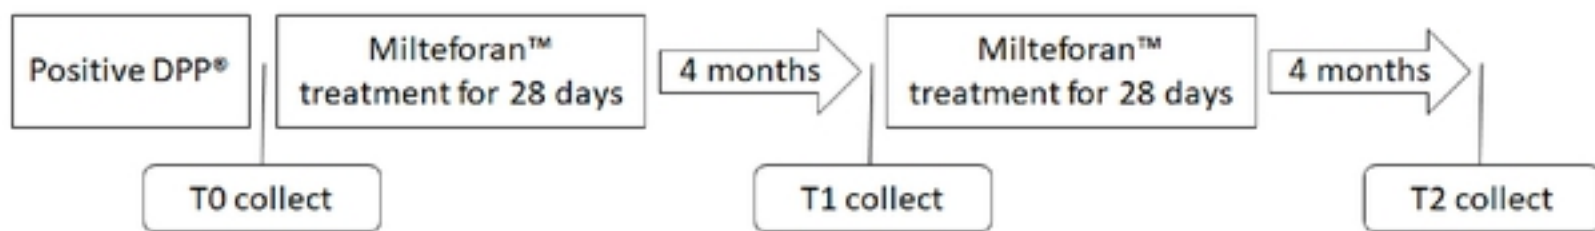

Figure 1: Schematic representation of the experimental design consisting of collection of T0 (parasites collected immediately after positivity in the DPP<sup>®</sup> test and before treating the dog with Milteforan<sup>™</sup>) isolates followed by treatment of the dog with the drug for 28 consecutive days; after four months, collection of T1 (parasites collected from the dog after one course of treatment) isolates followed by another treatment of the dog with Milteforan<sup>™</sup> for 28 days; finally, after another 4-month interval, collection of T2 (parasites collected from the dog after two courses of treatment) isolates.

bioRxiv preprint doi: <https://doi.org/10.1101/2021.04.08.438938>; this version posted April 8, 2021. The copyright holder for this preprint (which was not certified by peer review) is the author/funder, who has granted bioRxiv a license to display the preprint in perpetuity. It is made available under aCC-BY 4.0 International license.



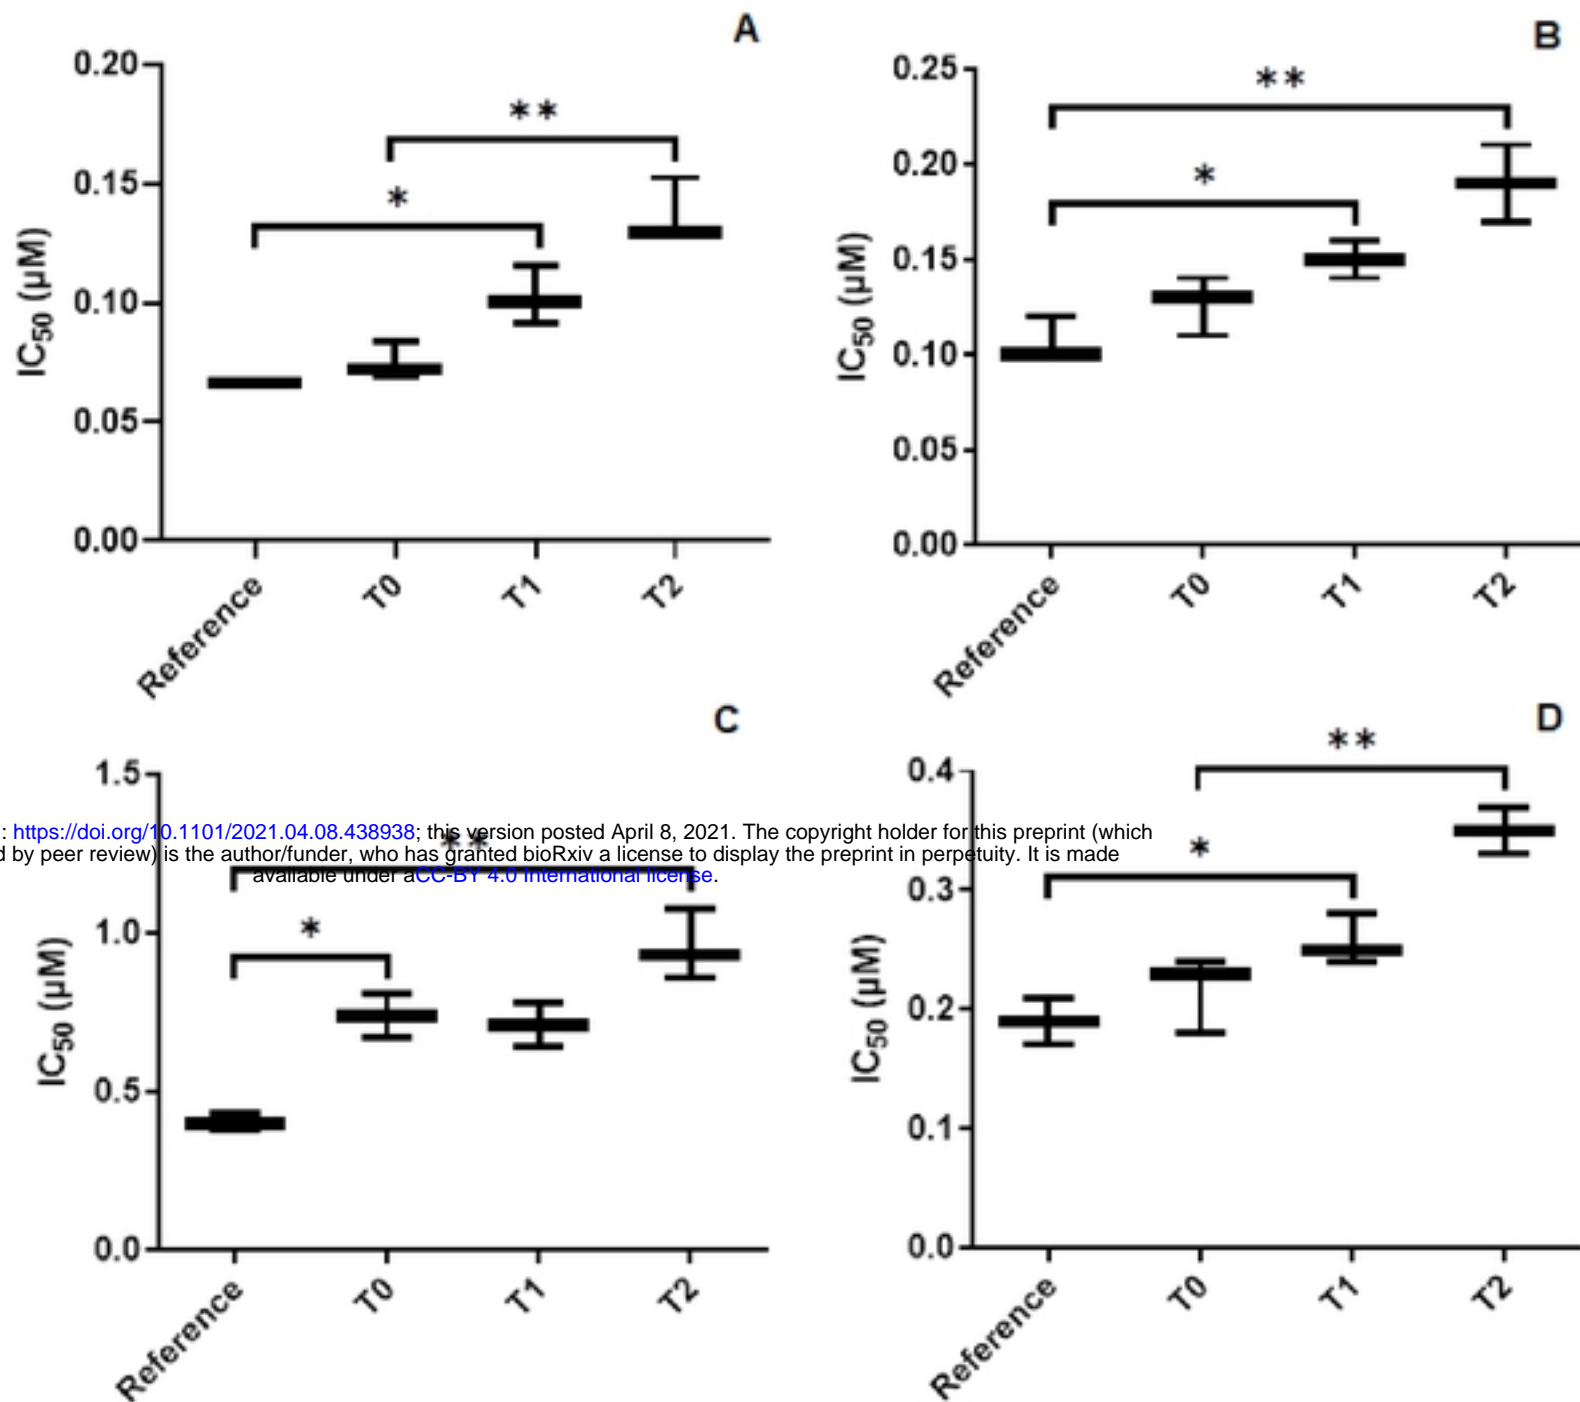

Figure 2: Results of in vitro resistance tests of the isolates and the reference strain to the drugs tested. Graphs A and B show the IC<sub>50</sub> values of the promastigote (Graph A) and amastigote (Graph B) forms of the isolates and reference strain against miltefosine. Graphs C and D show the IC<sub>50</sub> values of promastigote (Graph C) and amastigote (Graph D) forms of the isolates and reference strain against amphotericin B. Statistical significance is demonstrated by the asterisks, with one asterisk (\*) denoting significance <0.05% and two asterisks (\*\*) corresponding to significance <0.01%.



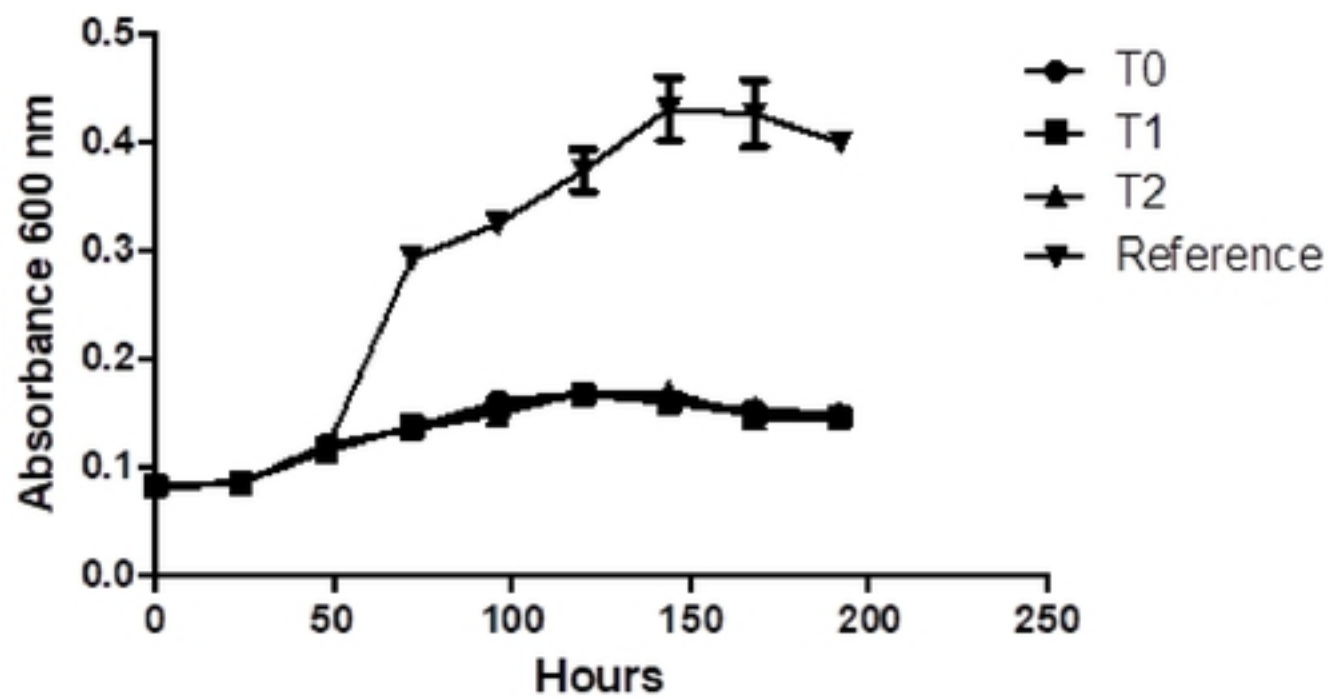

bioRxiv preprint doi: <https://doi.org/10.1101/2021.04.08.438938>; this version posted April 8, 2021. The copyright holder for this preprint (which was not certified by peer review) is the author/funder, who has granted bioRxiv a license to display the preprint in perpetuity. It is made available under aCC-BY 4.0 International license.

Figure 3: Growth curve of the T0, T1, T2, and reference strain (MHOM/BR/74/PP75) isolates in daily readings of parasite density on a spectrophotometer at 600 nm for eight days.

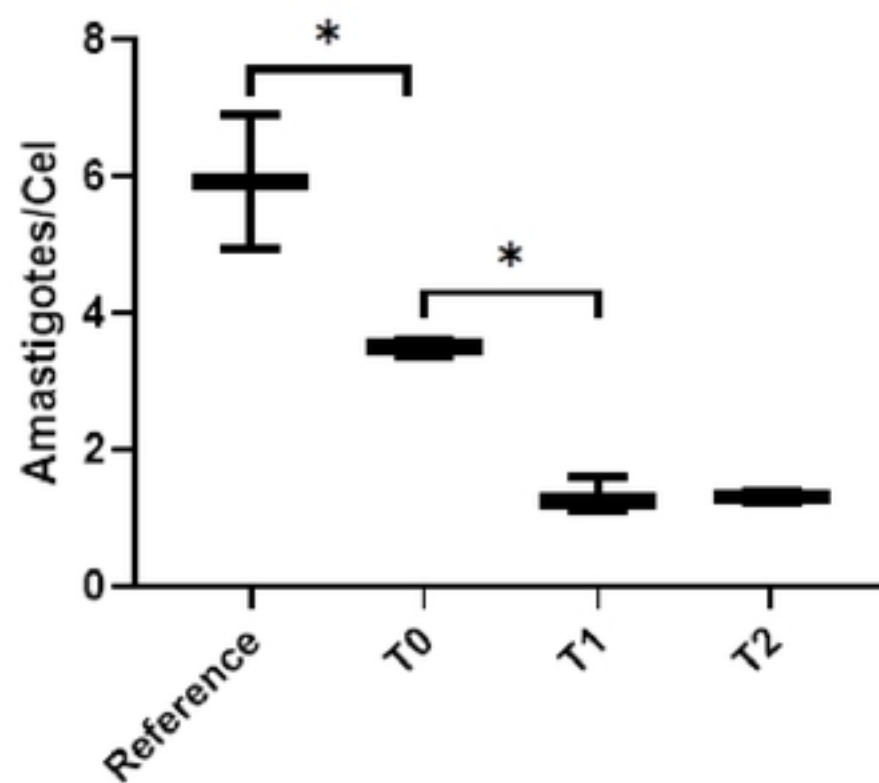

Figure 4: Average number of amastigotes per THP-1 cell infected with the reference strain (MHOM/BR/74/PP75), parasites isolated from the dog before treatment (T0), after one course of treatment (T1), and after two courses of

treatment (T2). Statistical significance is shown by asterisks, with one asterisk (\*) denoting significance <0.05%.

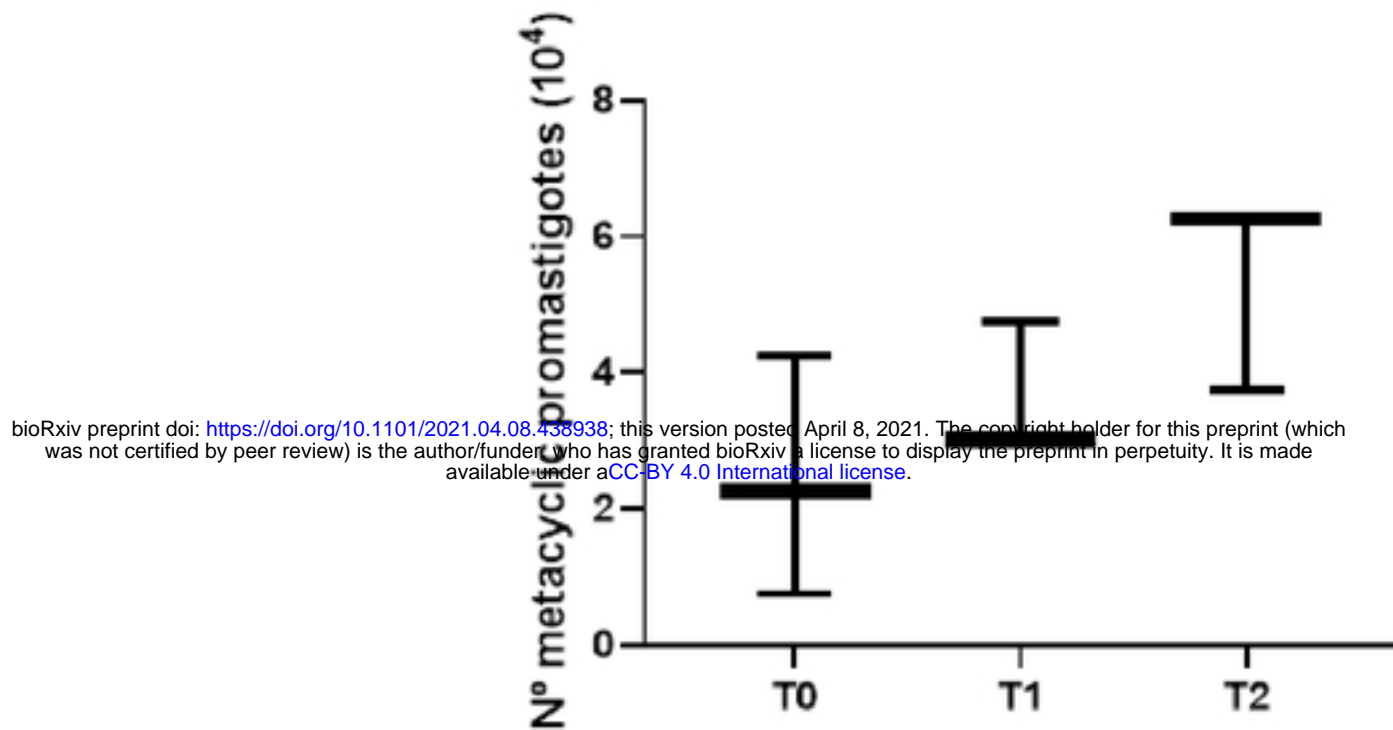

Figure 5: Number of metacyclic promastigotes for each isolate after 6 days of culture and differential selection with peanut agglutinin (PNA).
